# Supplementary material for: Activated Natural Killer Cells in Combination with Anti-GD2 Antibody Dinutuximab Improve Survival of Mice after Surgical Resection of Primary Neuroblastoma
Source: Oxford University Press journal article supplement (doi:10.1158/1078-0432.ccr-18-1317), 2018-09-19
Supplement: 10780432ccr181317-sup-200954_2_supp_5017545_prr52c.docx [file 10780432ccr181317-sup-200954_2_supp_5017545_prr52c.docx]

**SUPPLEMENTAL FIGURE LEGEND**

**Supplemental Figure S1**. GD2 expression levels were assessed by flow cytometry using the relatively bright fluorochrome allophycoyanin (APC). Images are representative of three independent replicates and numbers indicate mean fluorescent intensity (MFI) index.
